# Supplementary material for: Ring-opening polymerization of cyclic esters initiated by zirconium, titanium and yttrium complexes
Source: Royal Society of Chemistry journal article supplement (doi:10.1039/c4ra00201f), 2014-01-01
Supplement: c4ra00201f1.pdf [file c4ra00201f1.pdf]

### Supporting Information

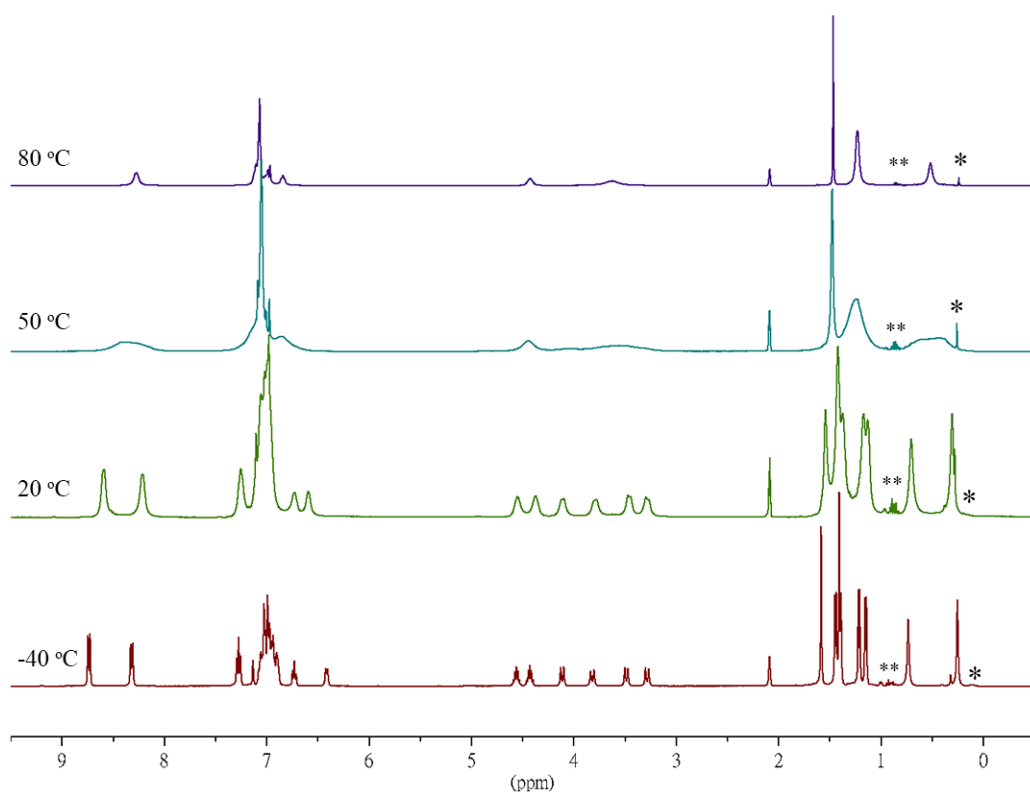

Fig. S1. Variable temperature dependent  $^1\text{H}$  NMR spectra of **6** (\*: grease; \*\*: Hex).

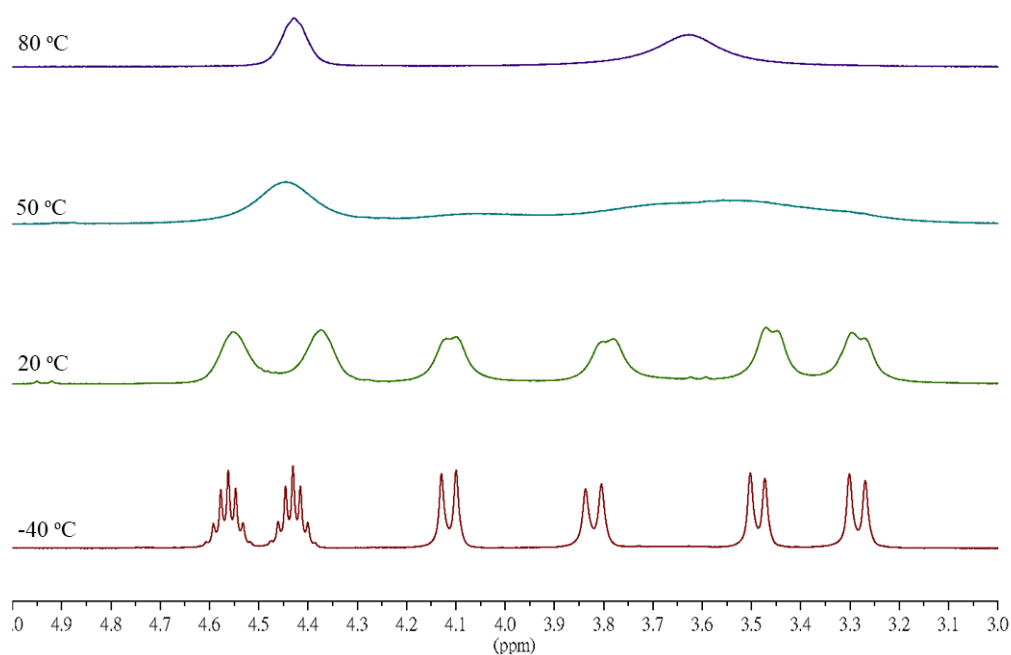

Fig. S2. Variable temperature dependent  $^1\text{H}$  NMR spectra of **6** (\*: grease; \*\*: Hex) ranging from 3.0-5.0 ppm.
